# Supplementary material for: A new ESIPT-based fluorescent probe for highly selective and sensitive detection of hydrogen sulfide and its application in live-cell imaging
Source: Royal Society of Chemistry journal article supplement (doi:10.1039/c6nj03355e), 2016-12-21
Supplement: c6nj03355e1.pdf [file c6nj03355e1.pdf]

## Supporting Information

### A New ESIPT-Based Fluorescent Probe for Highly Selective and Sensitive Detection of Hydrogen Sulfide and Its Application in Live-Cell Imaging

Bo Chen,<sup>a</sup> Jing Huang,<sup>a</sup> Huiqing Geng,<sup>a</sup> Lingli Xuan,<sup>a</sup> Tengfei Xu,<sup>a</sup> Xin Li,<sup>b</sup> and Yifeng Han\*<sup>a</sup>

<sup>a</sup>*Department of Chemistry, The Key Laboratory of Advanced Textile Materials and Manufacturing Technology, Zhejiang Sci-Tech University, Hangzhou, 310018, China.*

<sup>b</sup>*ZJU-ENS Joint Laboratory of Medicinal Chemistry, College of Pharmaceutical Sciences, Zhejiang University, Hangzhou, 310058, China.*

*E-mail: zstuchem@gmail.com*

## Contents

|                                                |     |
|------------------------------------------------|-----|
| Photophysical properties of <b>PHS1</b> .....  | S3  |
| Additional spectroscopic data.....             | S4  |
| The characterization data of <b>PHS1</b> ..... | S18 |
| References.....                                | S21 |

## Photophysical properties of PHS1

**Table S1** Photophysical properties of the probe.

| entry                      | $\lambda_{em}$ (nm) | $\Phi^a$           | $\epsilon / M^{-1} \text{ cm}^{-1}$ |
|----------------------------|---------------------|--------------------|-------------------------------------|
| <b>PHS1</b>                | 483                 | 0.009              | 3277                                |
| <b>PHS1+H<sub>2</sub>S</b> | 483                 | 0.104 <sup>b</sup> | 4014                                |

(a) The quantum yield ( $\Phi$ ) of **PHS1** and **PHS1-H<sub>2</sub>S** system were determined according to the literature.<sup>1</sup> (b)  $\Phi$  was determined in the present of 2.0 equiv. of H<sub>2</sub>S.

$$\Phi_{Sample} = \frac{\Phi_{QS} \cdot A_{QS} \cdot F_{Sample} \cdot \lambda_{exQS} \cdot \eta_{Sample}^2}{A_{Sample} \cdot F_{QS} \cdot \lambda_{exSample} \cdot \eta_{QS}^2}$$

Where  $\Phi$  is quantum yield; A is absorbance at the excitation wavelength; F is integrated area under the corrected emission spectra;  $\lambda_{ex}$  is the excitation wavelength;  $\eta$  is the refractive index of the solution; the Sample and QS refer to the sample and the standard, respectively. We chose fluorescein in 0.1 M NaOH as standard, which has the quantum yield of 0.95.<sup>2</sup>

## Additional spectroscopic data

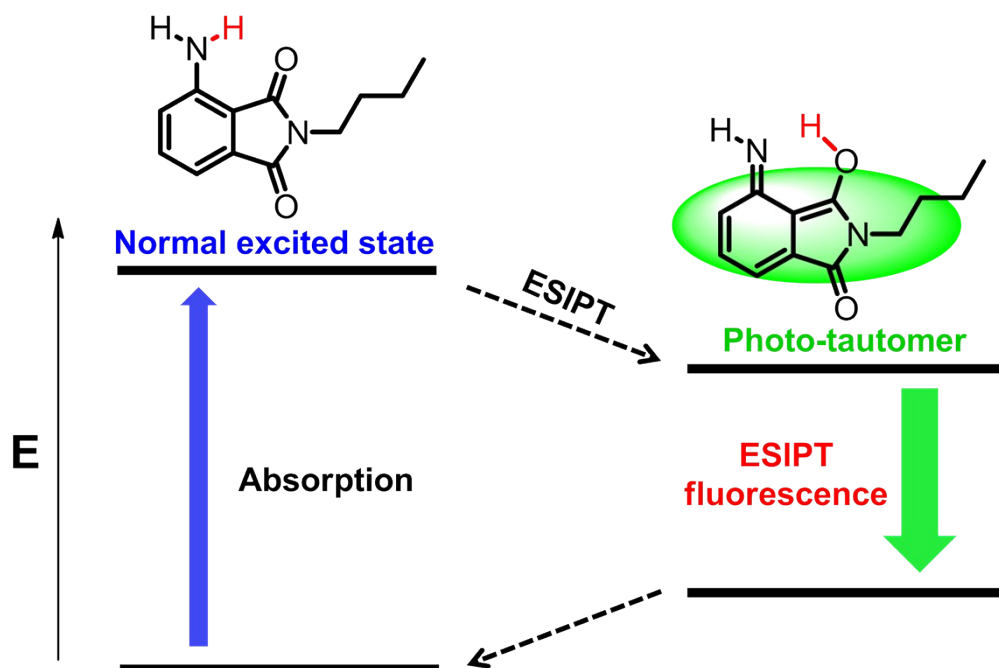

**Scheme S1** ESIP process of 3-aminophthalimide (3).

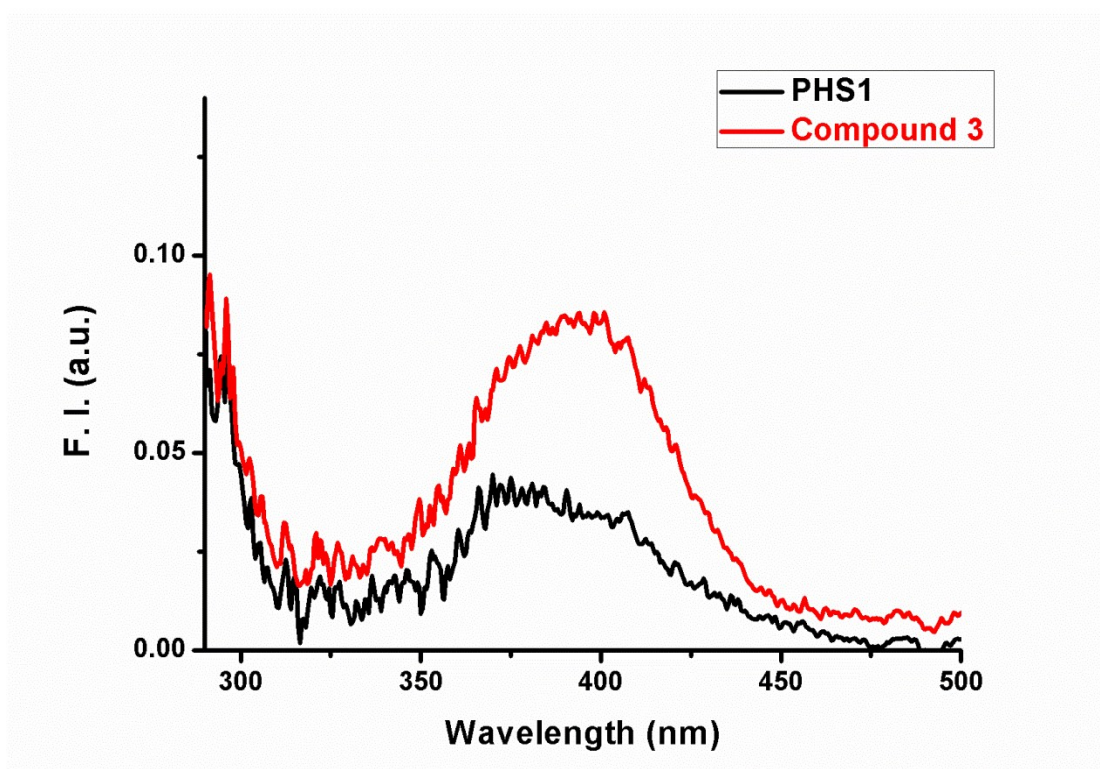

**Fig. S1** The UV-vis absorption (unsmoothed curves) of **PHS1** (10.0  $\mu\text{M}$ ) and compound **3** (10.0  $\mu\text{M}$ ) in PBS buffer solution (10 mM, pH 7.4, containing 50% EtOH). (Data were collected after incubation of **PHS1** with  $\text{H}_2\text{S}$  for 1 h).

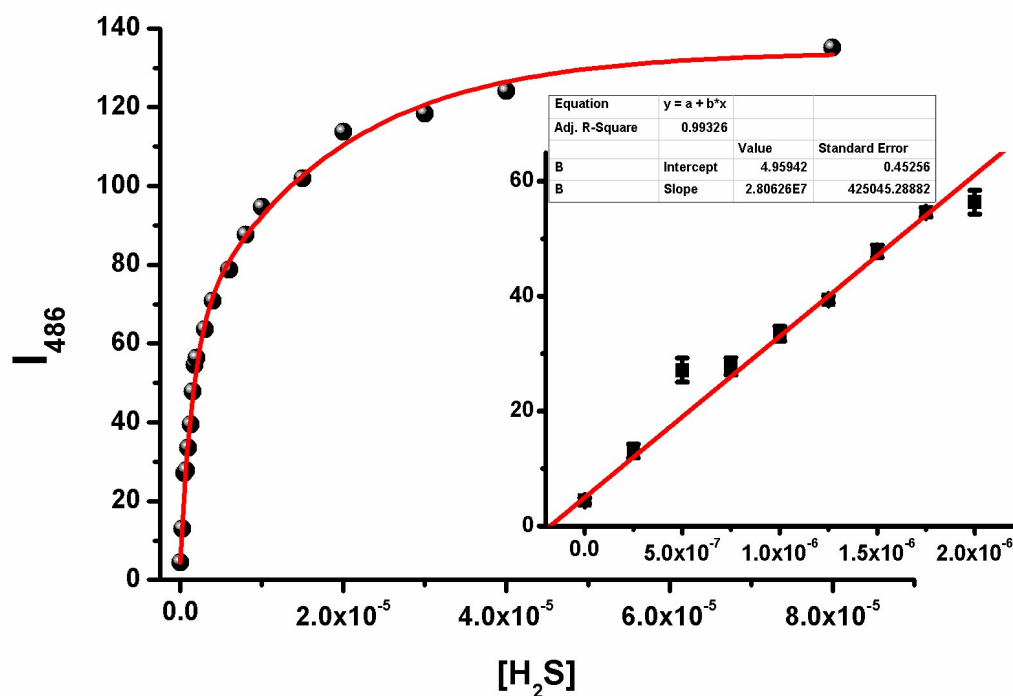

**Fig. S2** Fluorescence intensity of **PHS1** (10.0  $\mu\text{M}$ ) at 486 nm as a function of  $\text{H}_2\text{S}$  concentration (0-80.0  $\mu\text{M}$ ) in PBS buffer (10.0 mM, pH 7.4, containing 50% EtOH). Inset: fluorescence intensity of **PHS1** (10.0  $\mu\text{M}$ ) at 486 nm as a function of  $\text{H}_2\text{S}$  concentration (0-2.0  $\mu\text{M}$ ) in PBS buffer (10.0 mM, pH 7.4, containing 50% EtOH). (Data were collected after incubation of **PHS1** with  $\text{H}_2\text{S}$  for 1 h).

The detection limit (DL) of  $\text{H}_2\text{S}$  using **PHS1** was determined from the following equation: <sup>3</sup>

$$\text{DL} = 3 * \sigma / K$$

Where  $\sigma$  is the standard deviation of the blank solution; K is the slope of the calibration curve.

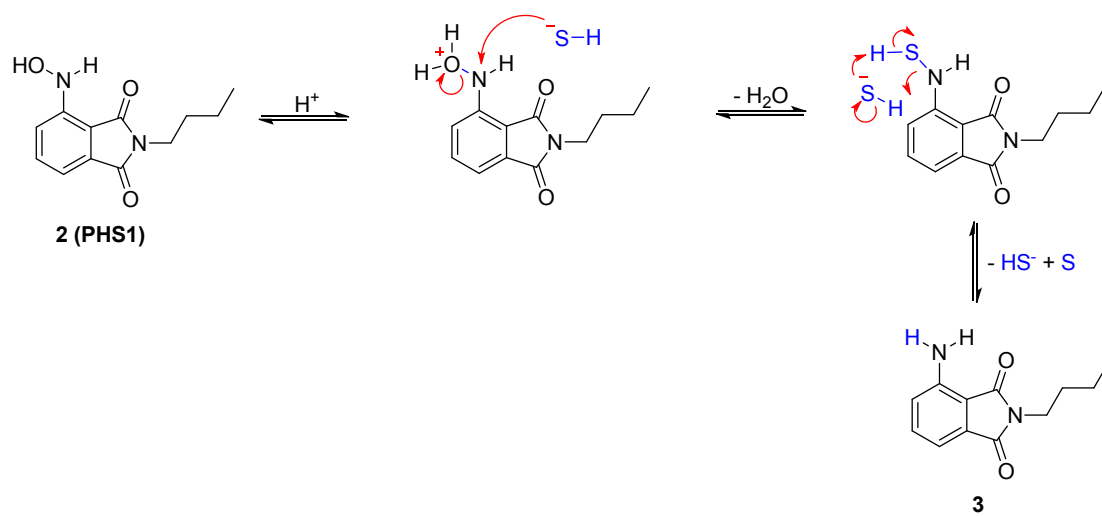

**Scheme S2** The proposed mechanism of **PHS1**-H<sub>2</sub>S interactions.

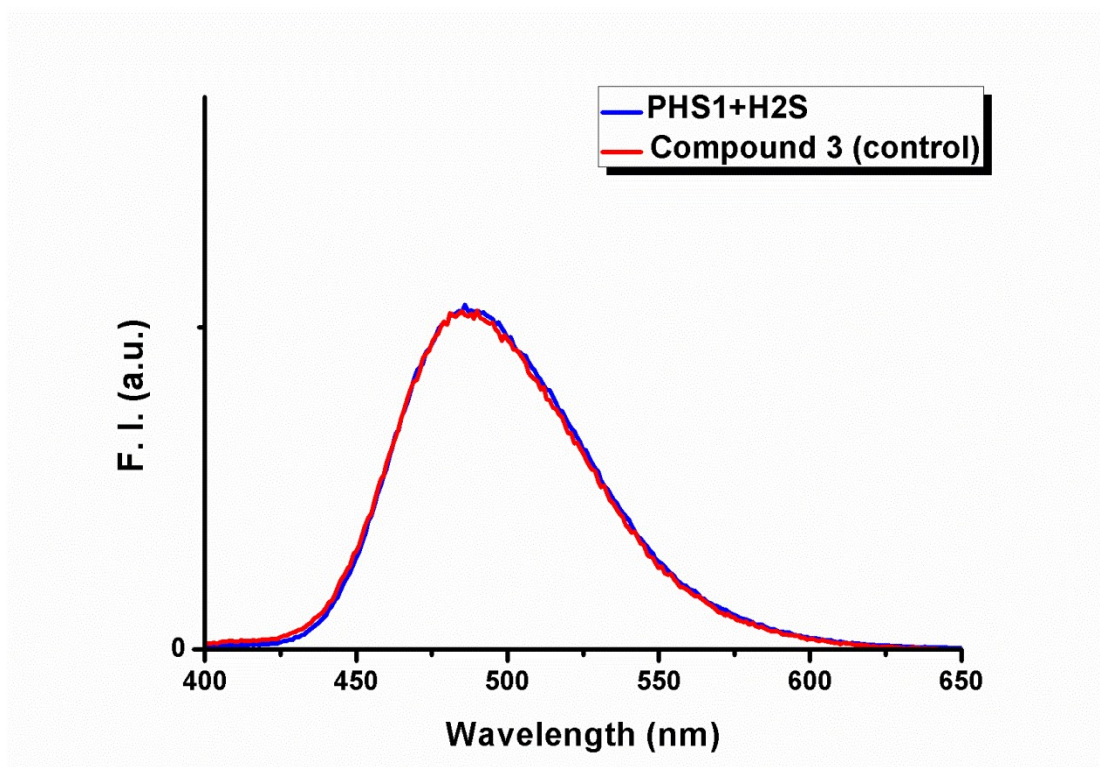

**Fig. S3** The comparison of fluorescence spectra of the probe-H<sub>2</sub>S mixture solution (**PHS1**-Na<sub>2</sub>S mixture solution) and control (compound **3**) in PBS buffer solution (10 mM, pH 7.4, containing 50% EtOH) ( $\lambda_{\text{ex}} = 393 \text{ nm}$ ).



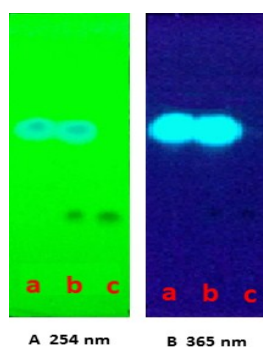

**Fig. S4** Comparison of the TLC analysis of **PHS1**, **PHS1-Na<sub>2</sub>S** system, and compound **3** (control).

The pictures of the thin layer chromatography TLC plates under different light used to compare probe **PHS1**, the reference sample of compound **3** and the reaction mixture of probe **PHS1** with Na<sub>2</sub>S in 1:1 PBS-EtOH (v/v). (A) Under light of 254 nm, and (B) under light of 365 nm. Spots on the TLC plate are: (a) compound **3**, (b) the reaction mixture of probe **PHS1** and Na<sub>2</sub>S, (c) probe **PHS1**. The eluent for TLC: hexane:EtOAc = 3:1 (v/v). This indicates that the reaction of probe **PHS1** with Na<sub>2</sub>S produced compound **3**.

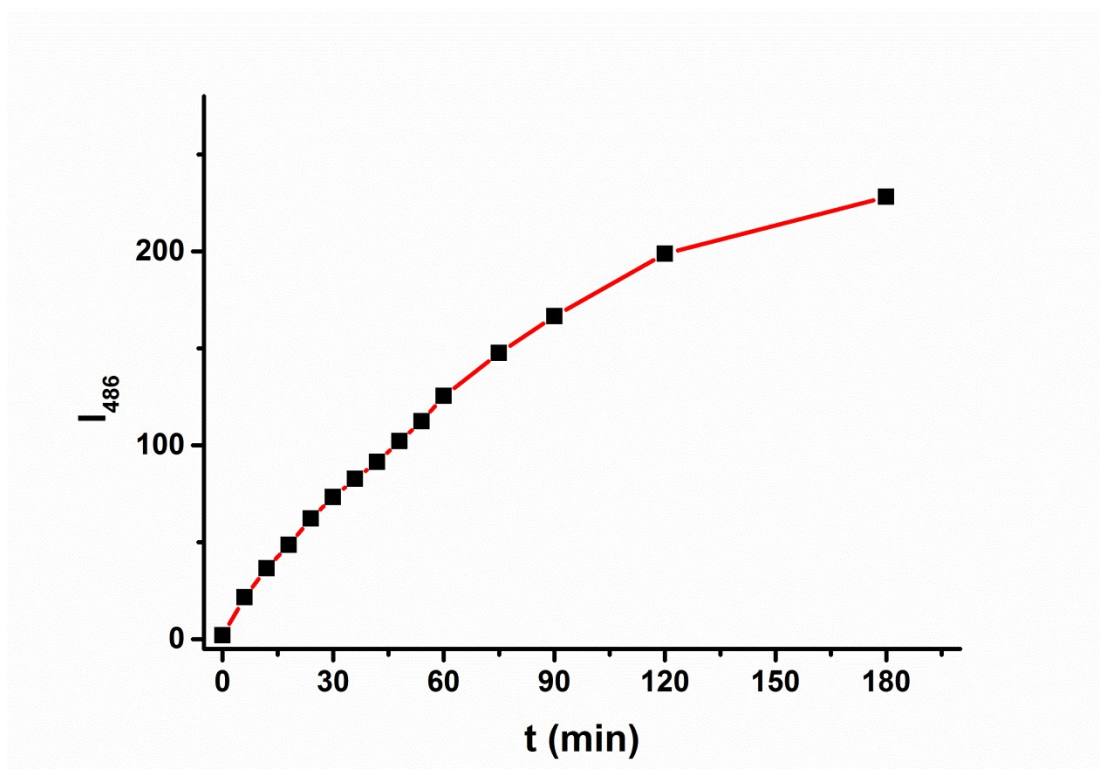

**Fig. S5** Kinetics of **PHS1** ( $10.0 \mu\text{M}$ ) in the presence of 2.0 equiv. of  $\text{H}_2\text{S}$  in PBS buffer solution (10 mM, pH 7.4, containing 50% EtOH) ( $\lambda_{\text{ex}} = 393 \text{ nm}$ ).

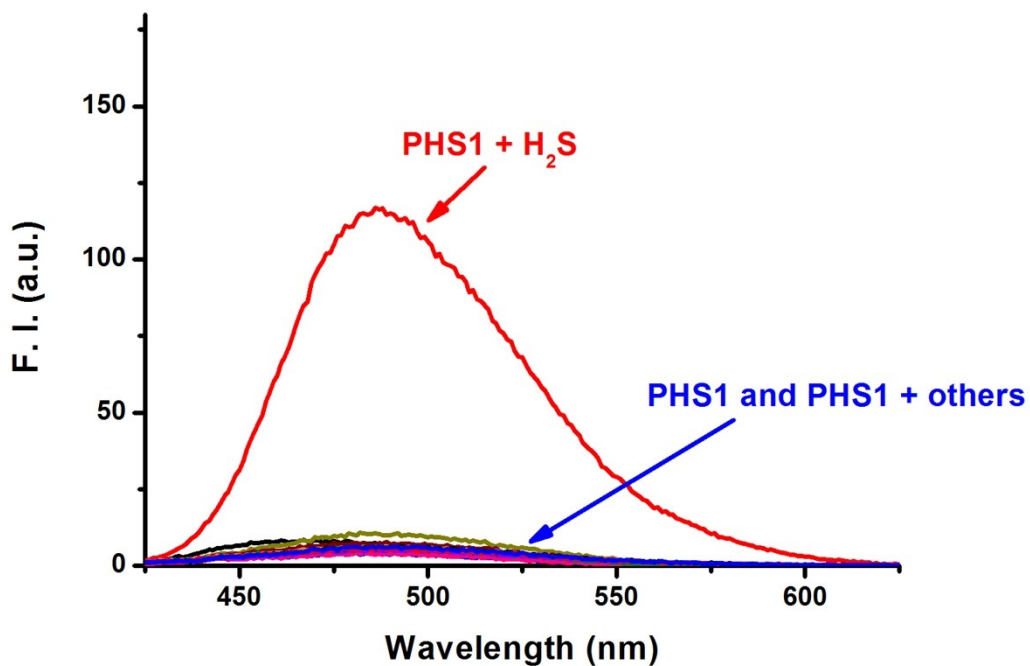

**Fig. S6** Fluorescence responses of **PHS1** ( $10.0 \mu\text{M}$ ) to various reactive sulfur species and coexisting ions ( $\text{H}_2\text{S}$  at  $20.0 \mu\text{M}$ ,  $\text{GSH}$  at  $1.0 \text{ mM}$ , and  $\text{Cys}$ ,  $\text{HSO}_3^-$ ,  $\text{S}_2\text{O}_4^{2-}$ ,  $\text{S}_2\text{O}_3^{2-}$ ,  $\text{SO}_3^{2-}$ ,  $\text{ClO}^-$ ,  $\text{I}^-$ ,  $\text{Fe}^{3+}$ ,  $\text{F}^-$ ,  $\text{Cl}^-$ ,  $\text{Br}^-$ ,  $\text{H}_2\text{PO}_4^-$ ,  $\text{NO}_3^-$  and  $\text{CO}_3^{2-}$  at  $100.0 \mu\text{M}$ , respectively) in PBS buffer solution ( $10 \text{ mM}$ ,  $\text{pH } 7.4$ , containing  $50\% \text{ EtOH}$ ) ( $\lambda_{\text{exc}} = 393 \text{ nm}$ ). (Data were collected after incubation of **PHS1** with each analytes for  $1 \text{ h}$ ).

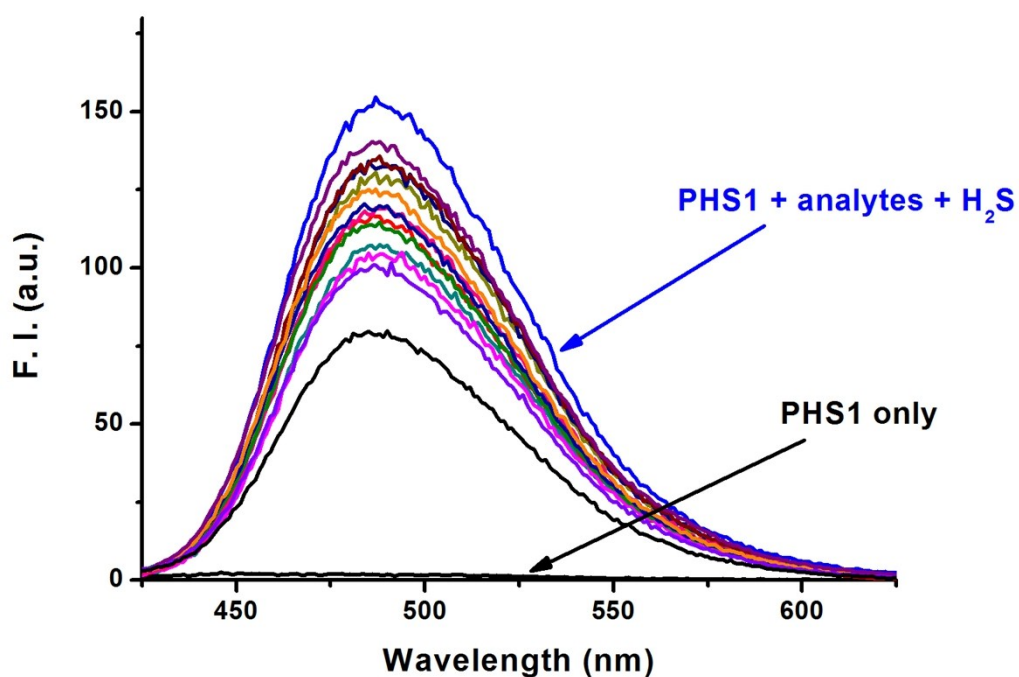

**Fig. S7** Fluorescence responses of **PHS1** ( $10.0 \mu\text{M}$ ) to  $\text{H}_2\text{S}$  ( $20.0 \mu\text{M}$ ) in the presence of various reactive sulfur species and coexisting ions (GSH at  $1.0 \text{ mM}$ , and Cys,  $\text{HSO}_3^-$ ,  $\text{S}_2\text{O}_4^{2-}$ ,  $\text{S}_2\text{O}_3^{2-}$ ,  $\text{SO}_3^{2-}$ ,  $\text{ClO}^-$ ,  $\text{I}^-$ ,  $\text{Fe}^{3+}$ ,  $\text{F}^-$ ,  $\text{Cl}^-$ ,  $\text{Br}^-$ ,  $\text{H}_2\text{PO}_4^-$ ,  $\text{NO}_3^-$  and  $\text{CO}_3^{2-}$  at  $100.0 \mu\text{M}$ , respectively) in PBS buffer solution ( $10 \text{ mM}$ , pH 7.4, containing 50% EtOH) ( $\lambda_{\text{exc}} = 393 \text{ nm}$ ). (Data were collected after incubation of **PHS1** with each analytes for 1 h).

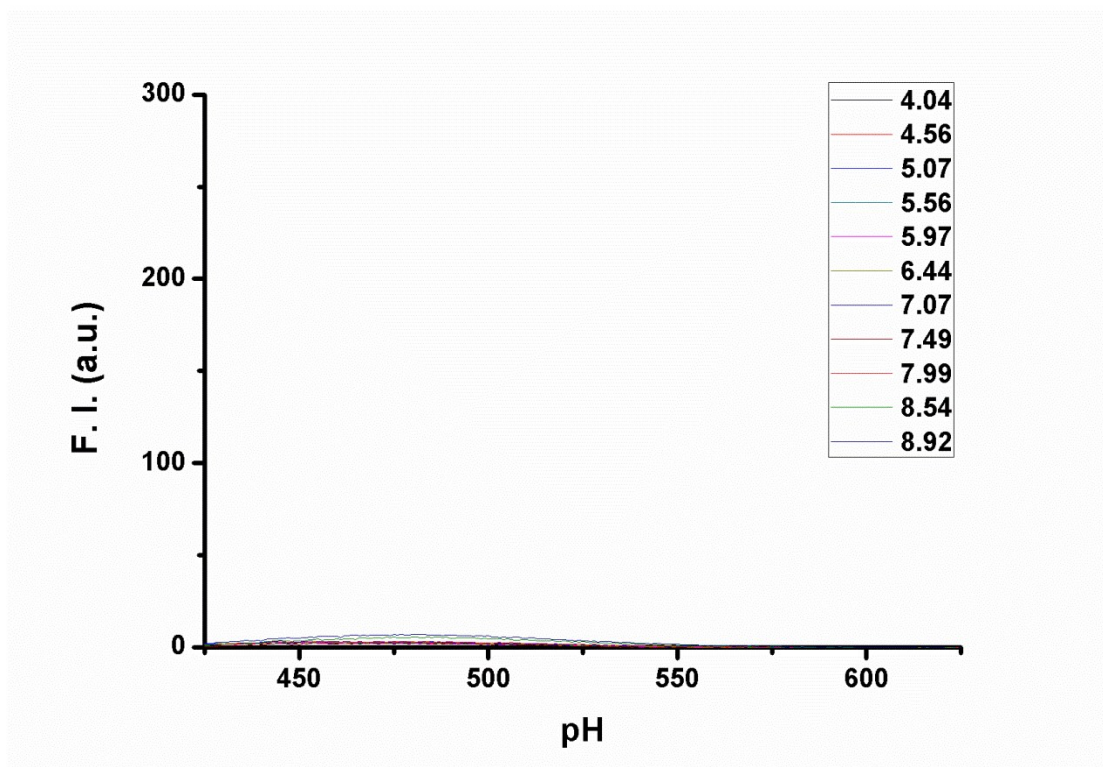

**Fig. S8** Effect of the pH on the fluorescence emission of **PHS1** ( $10.0 \mu\text{M}$ ) in buffer solution ( $\lambda_{\text{ex}} = 393 \text{ nm}$ ). (Data were collected after incubation of **PHS1** with  $\text{H}_2\text{S}$  for 1 h).

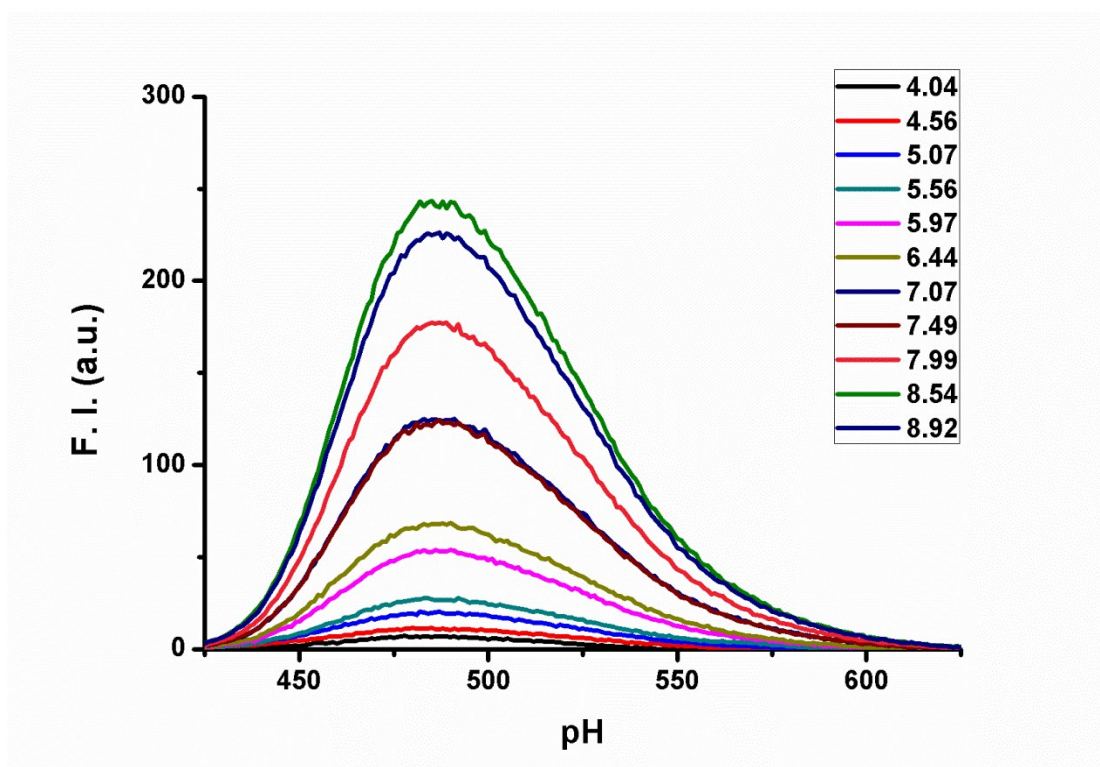

**Fig. S9** Effect of the pH on the fluorescence emission of **PHS1**-H<sub>2</sub>S system (10.0  $\mu$ M of **PHS1** and 2.0 equiv. of H<sub>2</sub>S) in buffer solution ( $\lambda_{\text{ex}} = 393$  nm). (Data were collected after incubation of **PHS1** with H<sub>2</sub>S for 1 h).

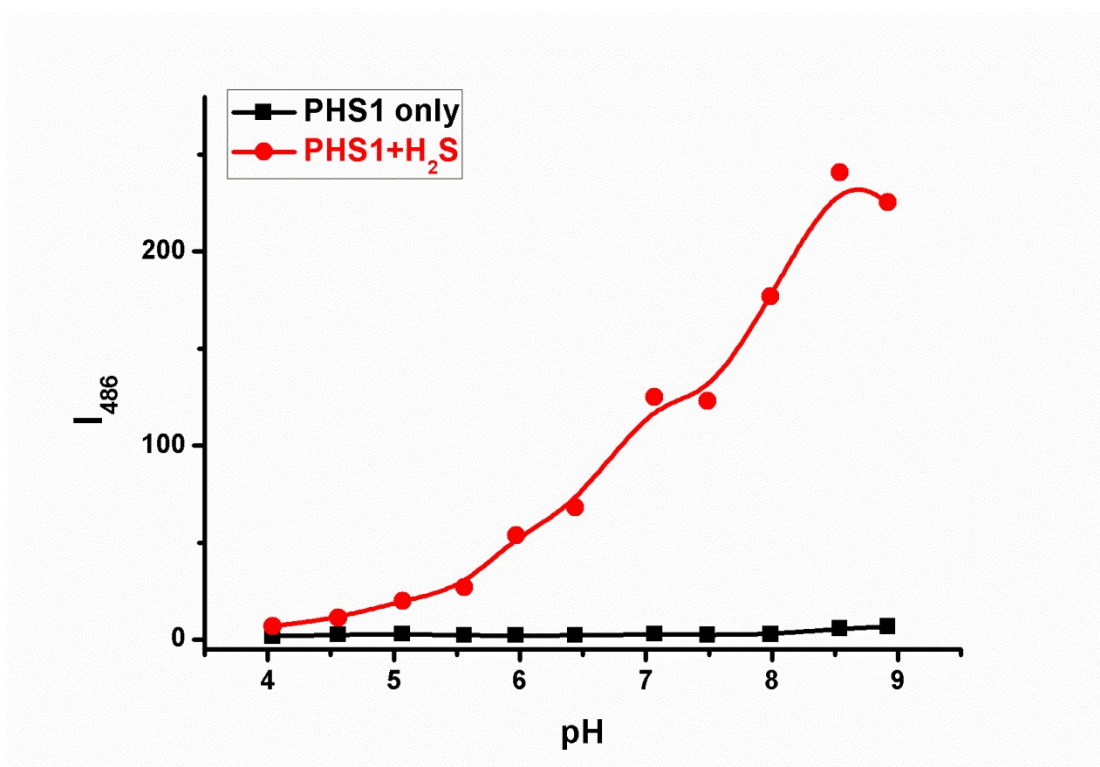

**Fig. S10** Effect of the pH on the fluorescence emission of **PHS1** (10.0  $\mu\text{M}$ ) and **PHS1-H<sub>2</sub>S** system (10.0  $\mu\text{M}$  of **PHS1** and 2.0 equiv. of H<sub>2</sub>S) in buffer solution ( $\lambda_{\text{ex}} = 393 \text{ nm}$ ). (Data were collected after incubation of **PHS1** with H<sub>2</sub>S for 1 h).

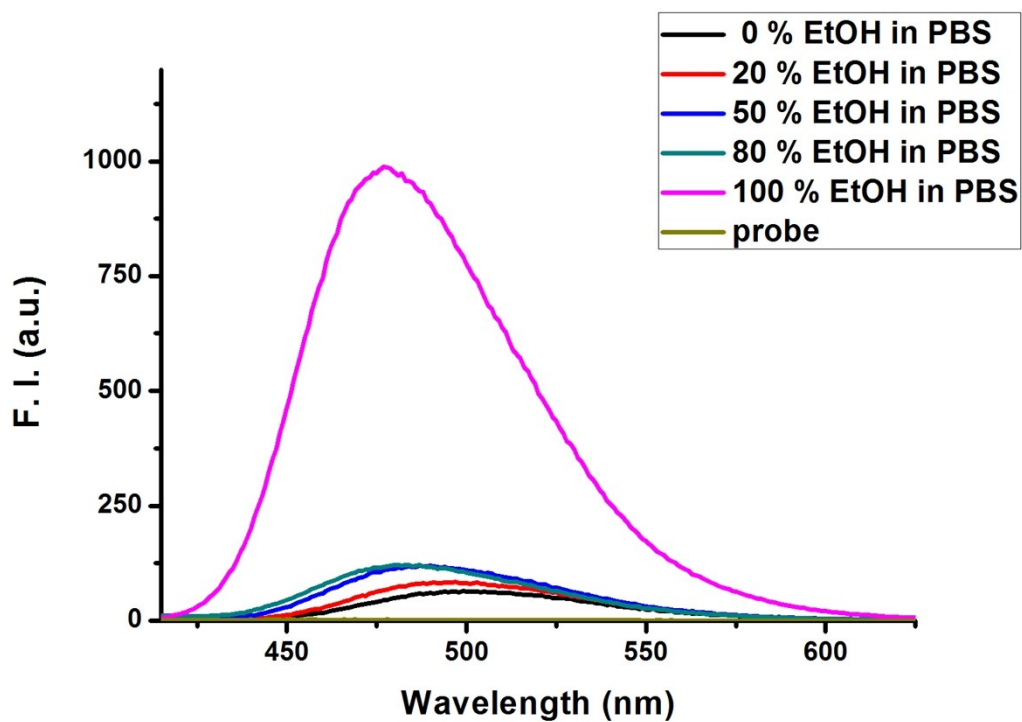

**Fig. S11** Effect of different contents of EtOH in PBS solution on the fluorescence emission of **PHS1** (10.0  $\mu\text{M}$ ) in the presence of 2.0 equiv. of  $\text{H}_2\text{S}$ . ( $\lambda_{\text{ex}} = 393 \text{ nm}$ ). (Data were collected after incubation of **PHS1** with  $\text{H}_2\text{S}$  for 1 h).



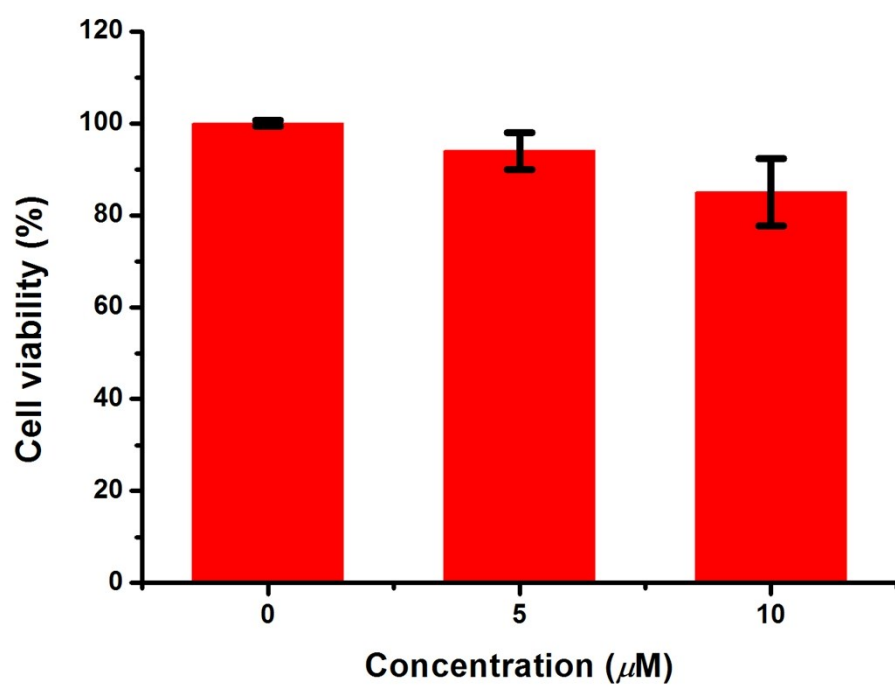

**Fig. S12** Cell viability of HeLa cells treated with different concentration of **PHS1** for different time periods. No cytotoxic effect was observed for the cells incubated with **PHS1** at 10  $\mu\text{M}$  even for 24 h.

## The characterization data of PHS1

<sup>1</sup>H NMR of 1

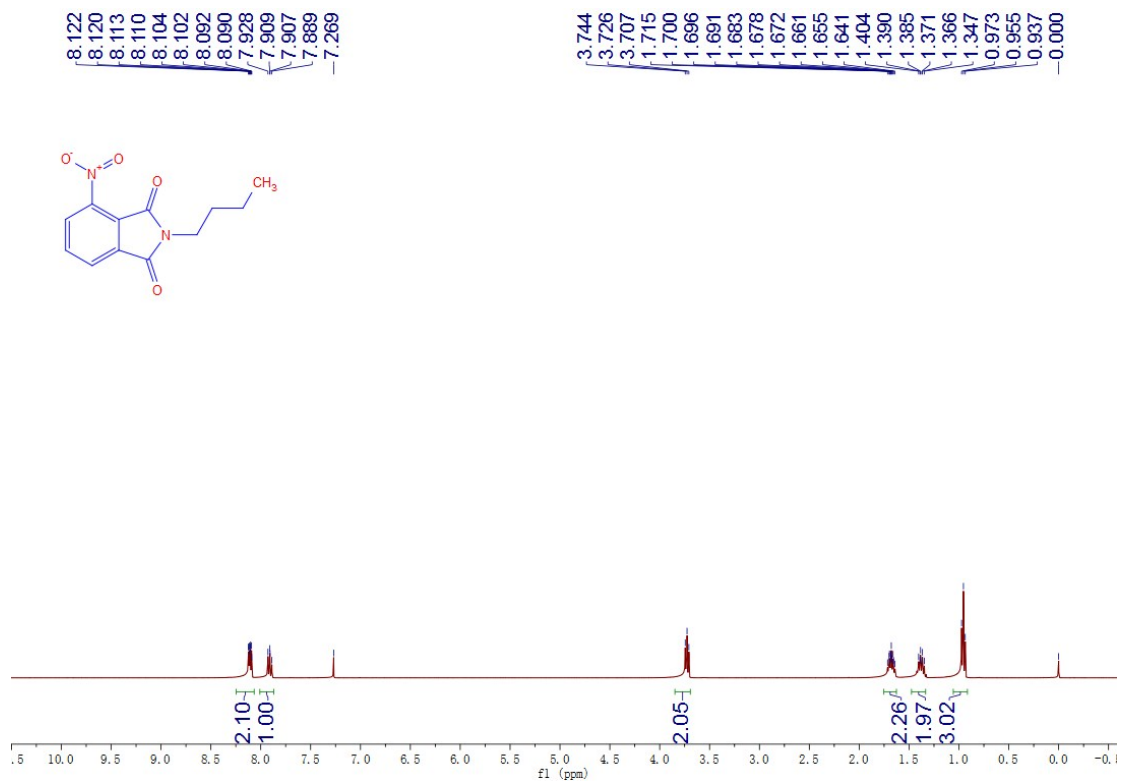

<sup>1</sup>H NMR of 2

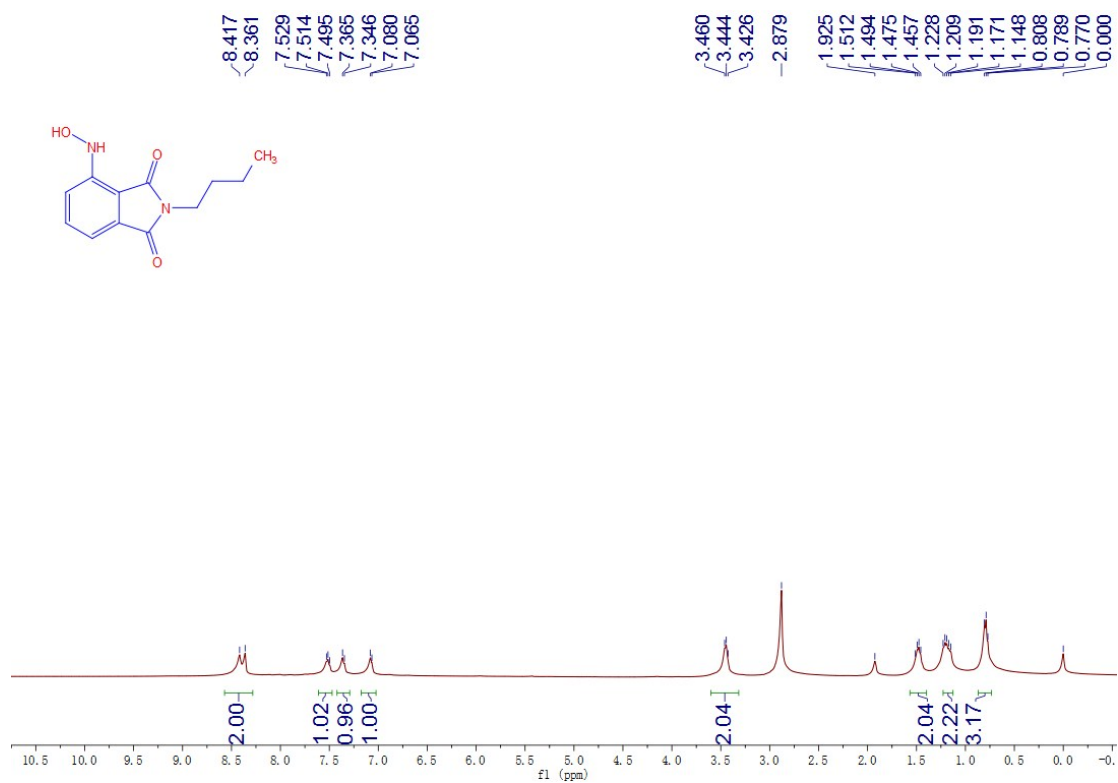

<sup>13</sup>C NMR of **2**

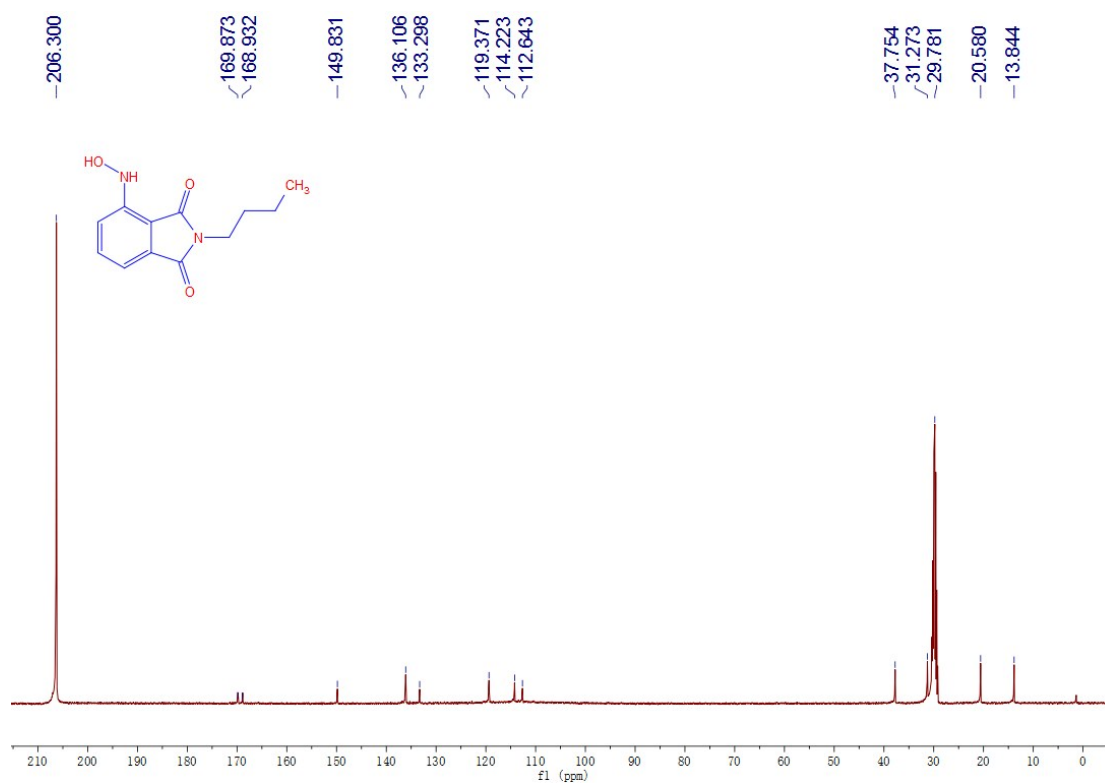

<sup>1</sup>H NMR of **3**

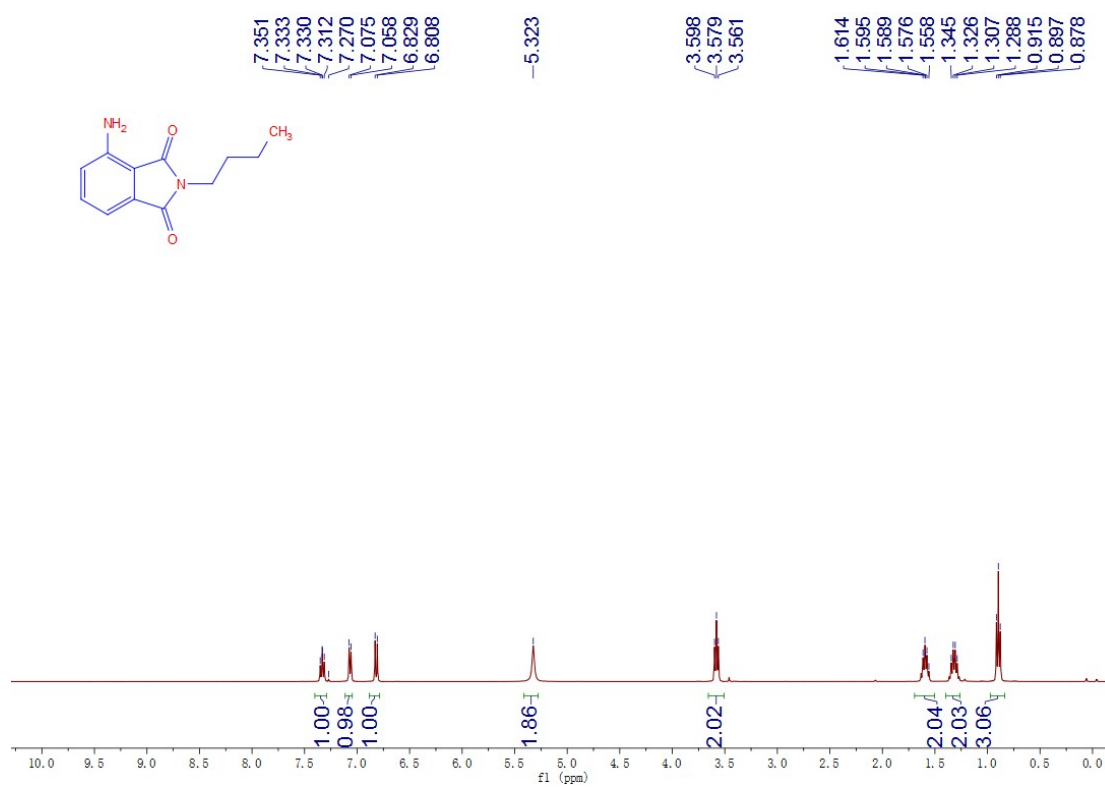

<sup>13</sup>C NMR of 3

~170.179  
~168.620

~145.114

~134.908  
~132.647

~121.143

~112.453  
~111.066

~77.319  
~77.000  
~76.682

~37.181

~30.583

~19.923

~13.639

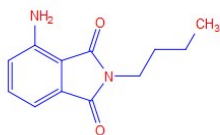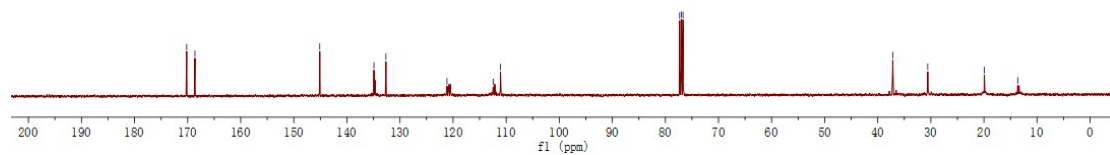

## References

- 1 R. A. Velapoldi, and H. H. Tønnesen, *J. Fluoresc.*, 2004, **14**, 465-472.
- 2 (a) D. F. Eaton, *Pure Appl. Chem.*, 1988, **60**, 1107-1114; (b) D. Magde, R. Wong, and P. G. Seybold, *Photochem. Photobiol.*, 2002, **75**, 327-334.
- 3 (a) J. T. Yeh, P. Venkatesan and S. P. Wu, *New J. Chem.*, 2014, **38**, 6198-6204. (b) A. Roy, D. Kand, T. Saha and P. Talukdar, *Chem. Commun.*, 2014, **50**, 5510-5513.
